# Supplementary material for: Effects of body plan evolution on the hydrodynamic drag and energy requirements of swimming in ichthyosaurs
Source: Proc Biol Sci. 2019 Mar 6;286(1898):20182786. doi: 10.1098/rspb.2018.2786 (PMC6458325; doi:10.1098/rspb.2018.2786)
Supplement: Drag forces and coefficients from the CFD simulations [file rspb20182786supp2.xlsx]

## Sheet: Validation
BODIES OF REVOLUTION VALIDATION RESULTS
DRAG COEFFICIENT
Total Drag coefficient (Cd)
	Velocity, v (m2)	Re	4154	4157	4159
EXPERIMENTAL (Gertler, 1950)	1.46	3.98682e+06	0.004	0.00358	0.00348
	2.93	8.00095e+06	0.00365	0.00323	0.00308
	4.39	1.19878e+07	0.0036	0.00308	0.00298
	5.86	1.60019e+07	0.00335	0.00288	0.00278
	7.32	1.99887e+07	0.00325	0.00273	0.00268
CFD, SST k-ω	1.46	3.98682e+06	0.00406611	0.00358003	0.00346552
	2.93	8.00095e+06	0.003565	0.00320676	0.00310586
	4.39	1.19878e+07	0.00344245	0.00301511	0.003046
	5.86	1.60019e+07	0.00330398	0.002901	0.002785
	7.32	1.99887e+07	0.00324955	0.00279802	0.00271523
Skin friction drag coefficient (Cf)
	Velocity, v (m2)	Re	4154	4157	4159
ITTC57	1.46	3.98682e+06	0.00354346	0.00354346	0.00354346
	2.93	8.00095e+06	0.0031197	0.0031197	0.0031197
	4.39	1.19878e+07	0.0029077	0.0029077	0.0029077
	5.86	1.60019e+07	0.00276922	0.00276922	0.00276922
	7.32	1.99887e+07	0.0026692	0.0026692	0.0026692
CFD, SST k-ω	1.46	3.98682e+06	0.0033825	0.00334335	0.003318
	2.93	8.00095e+06	0.003039	0.00299054	0.002961
	4.39	1.19878e+07	0.00286156	0.0028086	0.0028
	5.86	1.60019e+07	0.00274384	0.0027	0.00267
	7.32	1.99887e+07	0.00279	0.00260211	0.002572
PARAMETERS OF MODELS
			4154	4157	4159
Length (m)			2.74	2.74	2.74
Wetted surface area, S (m^2)			4.653	2.6173	1.7901

## Sheet: Ichthyosaur simulations
ICHTHYOSAUR SIMULATION RESULTS
FORCES (Newtons)
Total Drag, D
	Velocity, v (m2)	Re	Cartorhynchus short tail	Cartorhynchus long tail	Cartorhynchus	Chaohusaurus	Utatsusaurus	Mixosaurus	Shonisaurus	Guizhouichthyosaurus	Temnodontosaurus	Stenopterygius	Ophthalmosaurus	Tursiops
NO FINS	1	996605	0.505916	0.407791	0.456854	0.481812	0.534837	0.63886	0.952032	0.72698	0.798548	0.939193	1.08564	1.08504
	5	4.98303e+06	9.50027	7.6445	8.57238	8.86175	9.90215	11.8903	17.4917	13.5533	14.5952	17.3936	19.6604	20.0194
	10	9.96605e+06	33.8929	27.338	30.6154	31.5257	35.4027	42.5977	61.933	48.5568	52.1541	62.1058	69.8193	71.6934
	25	2.49151e+07	185.87	149.444	167.657	171.402	192.254	237.981	336.062	268.848	284.988	338.909	388.939	393.277
	50	4.98303e+07	693.997	558.94	626.468	639.625	717.306	866.158	1244.23	998.446	1064.65	1264.48	1415.44	1472.88
+FINS	1	996605	0.791427	0.656854	0.72414	0.867497	0.719377	0.975896	1.27725	1.12155	1.01581	1.20849	1.45788	1.31859
	5	4.98303e+06	13.6466	10.8415	12.2441	13.2515	13.0352	17.1957	22.5154	19.9989	18.1879	22.3639	25.019	23.6674
	10	9.96605e+06	48.8352	38.9759	43.9055	47.2164	46.4201	60.1623	79.27	71.5303	64.4884	80.9351	89.6784	83.929
	25	2.49151e+07	268.492	214.415	241.453	262.765	252.914	329.52	431.446	397.352	349.789	454.008	500.482	456.623
	50	4.98303e+07	1001.86	800.166	901.014	976.216	943.619	1250.63	1612.73	1471.85	1308.55	1646.39	1834.48	1698.22
Skin friction drag, Df
	Velocity, v (m2)	Re	Cartorhynchus short tail	Cartorhynchus long tail	Cartorhynchus	Chaohusaurus	Utatsusaurus	Mixosaurus	Shonisaurus	Guizhouichthyosaurus	Temnodontosaurus	Stenopterygius	Ophthalmosaurus	Tursiops
NO FINS	1	996605	0.449094	0.366376	0.407735	0.398667	0.438498	0.523736	0.658781	0.567336	0.665646	0.755404	0.870148	0.851581
	5	4.98303e+06	8.51202	6.93324	7.72263	7.54349	8.27892	9.97385	12.7594	10.8278	12.3748	14.4081	16.108	16.3402
	10	9.96605e+06	30.4767	24.8199	27.6483	26.9738	29.7117	35.8557	45.6054	38.9582	44.3349	51.6667	57.332	58.7254
	25	2.49151e+07	166.672	135.713	151.193	147.166	161.759	200.803	249.68	216.421	242.34	282.505	319.717	321.981
	50	4.98303e+07	622.716	507.001	564.859	549.402	603.87	730.549	930.647	804.178	904.552	1054.19	1162.1	1203.49
+FINS	1	996605	0.54578	0.438103	0.491942	0.482883	0.537171	0.688853	0.847451	0.752255	0.757449	0.846574	0.921231	1.02589
	5	4.98303e+06	10.4913	8.39473	9.44303	9.35737	10.1919	12.8656	15.892	14.5287	14.838	16.2489	18.0415	19.0874
	10	9.96605e+06	37.7949	30.5289	34.1619	33.5713	36.4894	45.3888	56.368	52.2541	52.4446	58.4413	64.9879	67.9075
	25	2.49151e+07	210.098	168.687	189.392	185.088	199.068	248.782	307.957	290.114	284.421	327.93	362.55	369.088
	50	4.98303e+07	785.066	629.514	707.29	689.007	742.162	929.263	1148.79	1072.3	1058.72	1192	1325.03	1369.91
Pressure drag, Dp
	Velocity, v (m2)	Re	Cartorhynchus short tail	Cartorhynchus long tail	Cartorhynchus	Chaohusaurus	Utatsusaurus	Mixosaurus	Shonisaurus	Guizhouichthyosaurus	Temnodontosaurus	Stenopterygius	Ophthalmosaurus	Tursiops
NO FINS	1	996605	0.0568223	0.0414153	0.0491188	0.0831445	0.0963386	0.115124	0.293251	0.159644	0.132902	0.183789	0.215493	0.233454
	5	4.98303e+06	0.988242	0.711253	0.849748	1.31825	1.62323	1.91642	4.73236	2.72553	2.22039	2.9855	3.55242	3.67918
	10	9.96605e+06	3.4162	2.51807	2.96714	4.55183	5.69094	6.74199	16.3276	9.59864	7.8192	10.4391	12.4873	12.968
	25	2.49151e+07	19.1977	13.7308	16.4643	24.2359	30.4946	37.178	86.3824	52.4276	42.6483	56.4041	69.2216	71.296
	50	4.98303e+07	71.2806	51.9389	61.6097	90.2232	113.436	135.608	313.588	194.268	160.103	210.29	253.343	269.39
+FINS	1	996605	0.245647	0.218751	0.232199	0.384614	0.182205	0.287043	0.4298	0.369294	0.258356	0.361919	0.536652	0.292707
	5	4.98303e+06	3.15529	2.44681	2.80105	3.89411	2.84332	4.33016	6.62338	5.47016	3.34983	6.11498	6.97751	4.57999
	10	9.96605e+06	11.0403	8.44703	9.74365	13.6452	9.93074	14.7736	22.9021	19.2762	12.0439	22.4938	24.6905	16.0214
	25	2.49151e+07	58.3941	45.728	52.061	77.6768	53.8461	80.7376	123.489	107.239	65.3682	126.078	137.932	87.5345
	50	4.98303e+07	216.796	170.652	193.724	287.209	201.458	321.366	463.946	399.552	249.827	454.386	509.454	328.308
COEFFICIENTS
Total Drag coefficient (Cd)
	Velocity, v (m2)	Re	Cartorhynchus short tail	Cartorhynchus long tail	Cartorhynchus	Chaohusaurus	Utatsusaurus	Mixosaurus	Shonisaurus	Guizhouichthyosaurus	Temnodontosaurus	Stenopterygius	Ophthalmosaurus	Tursiops
NO FINS	1	996605	0.00486105	0.00482686	0.00484396	0.00570208	0.0056561	0.00549673	0.00673797	0.00557911	0.00558531	0.00577445	0.00614827	0.00571181
	5	4.98303e+06	0.0036513	0.00361939	0.00363535	0.00419503	0.00418876	0.00409214	0.00485477	0.00416052	0.00408333	0.00427764	0.00445369	0.00421542
	10	9.96605e+06	0.00325657	0.00323589	0.00324623	0.00373095	0.00374397	0.0036651	0.00429732	0.00372643	0.00364783	0.00381845	0.00395405	0.00377406
	25	2.49151e+07	0.00285746	0.00283026	0.00284386	0.00324557	0.00325305	0.00327613	0.00373091	0.00330119	0.00318928	0.00333395	0.00352426	0.00331244
	50	4.98303e+07	0.00266728	0.00264638	0.00265683	0.0030279	0.00303431	0.00298096	0.00345333	0.00306498	0.00297862	0.00310976	0.0032064	0.0031014
+FINS	1	996605	0.00675391	0.0069587	0.0068563	0.00867888	0.00667022	0.00713617	0.0076721	0.00717436	0.00644297	0.006801	0.00753975	0.00649784
	5	4.98303e+06	0.00465832	0.00459421	0.00462626	0.00530298	0.0048346	0.00502971	0.00540975	0.00511717	0.00461442	0.005035	0.00517563	0.00466518
	10	9.96605e+06	0.00416751	0.0041291	0.00414831	0.00472377	0.00430417	0.00439933	0.00476154	0.00457568	0.00409032	0.004555	0.00463791	0.0041359
	25	2.49151e+07	0.00366603	0.00363441	0.00365022	0.00420613	0.00375211	0.00385534	0.00414652	0.00406688	0.00354979	0.004088	0.00414136	0.00360027
	50	4.98303e+07	0.00341989	0.00339078	0.00340533	0.00390662	0.00349978	0.00365805	0.0038749	0.00376608	0.0033199	0.003706	0.00379496	0.00334743
Skin friction drag coefficient (Cf)
	Velocity, v (m2)	Re	Cartorhynchus short tail	Cartorhynchus long tail	Cartorhynchus	Chaohusaurus	Utatsusaurus	Mixosaurus	Shonisaurus	Guizhouichthyosaurus	Temnodontosaurus	Stenopterygius	Ophthalmosaurus	Tursiops
NO FINS	1	996605	0.00431508	0.00433664	0.00432586	0.00471809	0.00463729	0.00450621	0.00474255	0.00435395	0.00465574	0.00464445	0.00492788	0.00448287
	5	4.98303e+06	0.00327148	0.00328264	0.00327706	0.00357098	0.00350211	0.00343259	0.00354132	0.00332385	0.00346213	0.00354341	0.00364895	0.00344071
	10	9.96605e+06	0.00292833	0.00293783	0.00293308	0.00319226	0.00314213	0.00308502	0.0031644	0.0029898	0.00310093	0.00317662	0.00324686	0.00309141
	25	2.49151e+07	0.00256233	0.00257022	0.00256627	0.00278665	0.00273706	0.00276433	0.00277191	0.00265743	0.00271201	0.00277908	0.00289703	0.00271194
	50	4.98303e+07	0.00239333	0.00240047	0.0023969	0.00260079	0.00255446	0.00251425	0.00258298	0.00246862	0.00253069	0.00259259	0.0026325	0.00253416
+FINS	1	996605	0.0046576	0.00464126	0.00464943	0.00483101	0.00498077	0.00503719	0.00509041	0.00481205	0.00509502	0.004764	0.00476434	0.00505542
	5	4.98303e+06	0.00358125	0.00355735	0.0035693	0.00374464	0.00378005	0.00376315	0.00381835	0.00371751	0.00376454	0.003658	0.00373221	0.0037624
	10	9.96605e+06	0.00322535	0.00323423	0.00322979	0.00335864	0.00338337	0.00331902	0.00338587	0.00334261	0.00332641	0.003289	0.00336099	0.00334638
	25	2.49151e+07	0.00286871	0.00285931	0.00286401	0.00296274	0.00295328	0.00291072	0.0029597	0.00296929	0.00288641	0.002953	0.003	0.0029101
	50	4.98303e+07	0.00267985	0.00266763	0.00267374	0.00275727	0.00275259	0.00271807	0.00276019	0.00274373	0.00268607	0.002683	0.00274106	0.00270029
Pressure drag coefficient (Cp)
	Velocity, v (m2)	Re	Cartorhynchus short tail	Cartorhynchus long tail	Cartorhynchus	Chaohusaurus	Utatsusaurus	Mixosaurus	Shonisaurus	Guizhouichthyosaurus	Temnodontosaurus	Stenopterygius	Ophthalmosaurus	Tursiops
NO FINS	1	996605	0.000545972	0.000490216	0.000518094	0.000983986	0.00101882	0.000990521	0.00199542	0.00122516	0.000929561	0.00112999	0.00122059	0.00122894
	5	4.98303e+06	0.000379818	0.000336753	0.000358285	0.000624044	0.000686652	0.000659553	0.00131345	0.000836669	0.000621204	0.000734231	0.000804862	0.000774712
	10	9.96605e+06	0.000328243	0.000298054	0.000313149	0.000538694	0.000601839	0.000580079	0.00113292	0.000736635	0.000546901	0.000641831	0.000707305	0.000682657
	25	2.49151e+07	0.000295136	0.000260041	0.000277588	0.000458918	0.000515987	0.000511806	0.000959005	0.000643758	0.000477273	0.000554864	0.000627334	0.000600503
	50	4.98303e+07	0.000273957	0.000245912	0.000259935	0.000427104	0.00047985	0.000466709	0.000870351	0.000596352	0.000447924	0.000517171	0.000573993	0.000567247
+FINS	1	996605	0.00209631	0.00231744	0.00220688	0.00384787	0.00168945	0.0021	0.00258169	0.00236232	0.00134795	0.002037	0.00277541	0.00144242
	5	4.98303e+06	0.00107707	0.00103686	0.00105696	0.00155835	0.00105455	0.00127	0.00159139	0.00139967	0.000849881	0.001377	0.00144343	0.00090278
	10	9.96605e+06	0.000942158	0.000894878	0.000918518	0.00136513	0.000920799	0.00108	0.00137566	0.00123307	0.000763908	0.001266	0.00127692	0.000789512
	25	2.49151e+07	0.000797321	0.000775107	0.000786214	0.00124339	0.000798836	0.00094	0.00118682	0.00109758	0.000663379	0.001135	0.00114135	0.000690171
	50	4.98303e+07	0.00074004	0.000723153	0.000731596	0.00114936	0.000747183	0.00088	0.00111472	0.00102235	0.000633834	0.001023	0.0010539	0.000647142
PARAMETERS OF MODELS
			Cartorhynchus short tail	Cartorhynchus long tail	Cartorhynchus	Chaohusaurus	Utatsusaurus	Mixosaurus	Shonisaurus	Guizhouichthyosaurus	Temnodontosaurus	Stenopterygius	Ophthalmosaurus	Tursiops
Length (m)			1	1	1	1	1	1	1	1	1	1	1	1
Wetted surface area, S (m^2) NO FINS			0.208526	0.169272	0.188899	0.170019	0.18946	0.232823	0.288749	0.26119	0.286462	0.32588	0.353733	0.380612
Wetted surface area, S (m^2) + FINS			0.234784	0.189127	0.211955	0.20027	0.216087	0.273964	0.33356	0.31322	0.315891	0.35601	0.387271	0.407
