# Supplementary material for: Effects of body plan evolution on the hydrodynamic drag and energy requirements of swimming in ichthyosaurs
Source: Proc Biol Sci. 2019 Mar 6;286(1898):20182786. doi: 10.1098/rspb.2018.2786 (PMC6458325; doi:10.1098/rspb.2018.2786)
Supplement: Net cost of locomotion calculations [file rspb20182786supp3.xlsx]

## Sheet: Dynamic similarity
DYNAMIC SIMILARITY (SAME TOTAL LENGTH, SAME VELOCITY). FULL MODELS
BODY LENGTH = 1 m						Velocity =	1 m/s									Velocity =	2 m/s
						Re =	996605									Re =	1.99321e+06
								COTdrag		COTnet (mean)		COTnet (upper limit)		COTnet (lower limit)				COTdrag		COTnet (mean)		COTnet (upper limit)		COTnet (lower limit)
		Length (m)	Wetted area (m^2)	Volume (m^3)	Mass (kg)	Drag (N)	D/V	Absolute (J/kg m)	Relative	Absolute (J/kg m)	Relative	Absolute (J/kg m)	Relative	Absolute (J/kg m)	Relative	Drag (N)	D/V	Absolute (J/kg m)	Relative	Absolute (J/kg m)	Relative	Absolute (J/kg m)	Relative	Absolute (J/kg m)	Relative
	Cartorhynchus short	1	0.234784	0.004389	4.49872	0.791427	180.321	0.175922	1.58632	0.367452	2.68424	0.409122	2.98864	0.325782	2.37984	2.59917	592.2	0.577756	1.59856	1.20677	2.70495	1.34362	3.0117	1.06992	2.3982
	Cartorhynchus long	1	0.189127	0.0028935	2.96584	0.656854	227.01	0.221473	1.99706	0.462595	3.37926	0.515054	3.76248	0.410136	2.99605	2.18103	753.769	0.735384	2.03469	1.53601	3.44293	1.7102	3.83337	1.36182	3.0525
	Cartorhynchus	1	0.211955	0.00364125	3.73228	0.72414	203.665	0.198698	1.79169	0.415024	3.03175	0.462088	3.37556	0.367959	2.68794	2.3901	672.985	0.65657	1.81663	1.37139	3.07394	1.52691	3.42253	1.21587	2.72535
	Utatsusaurus	1	0.216087	0.00373598	3.82938	0.719377	192.554	0.187857	1.69394	0.392381	2.86635	0.436877	3.19139	0.347884	2.5413	2.47401	662.213	0.646061	1.78755	1.34944	3.02474	1.50247	3.36775	1.19641	2.68173
	Chaohusaurus	1	0.20027	0.00316905	3.24828	0.867497	273.74	0.267064	2.40816	0.557821	4.07489	0.621079	4.53699	0.494563	3.61279	2.58804	816.663	0.796744	2.20447	1.66417	3.73021	1.85289	4.15322	1.47545	3.3072
	Mixosaurus	1	0.273964	0.00573571	5.8791	0.975896	170.144	0.165994	1.4968	0.346715	2.53275	0.386033	2.81997	0.307396	2.24553	3.17334	553.261	0.539767	1.49345	1.12742	2.52709	1.25527	2.81367	0.999568	2.24051
	Shonisaurus	1	0.33356	0.00884225	9.06331	1.28	144.76	0.141229	1.27349	0.294987	2.15488	0.328439	2.39925	0.261535	1.91052	4.14246	468.485	0.457058	1.26461	0.954665	2.13986	1.06293	2.38253	0.846404	1.8972
	Guizhouichthyosaurus	1	0.31322	0.006535	6.69838	1.12155	171.622	0.167436	1.5098	0.349726	2.55476	0.389386	2.84447	0.310067	2.26504	3.80294	581.934	0.567741	1.57085	1.18585	2.65806	1.32033	2.95949	1.05137	2.35663
	Temnodontosaurus	1	0.315891	0.00733228	7.51559	1.02	139.111	0.135718	1.22379	0.167528	1.22379	0.185915	1.35811	0.149141	1.08947	3.38208	461.259	0.450009	1.2451	0.555483	1.2451	0.616451	1.38176	0.494516	1.10845
	Stenopteryigius	1	0.358199	0.00953399	9.77234	1.20849	126.756	0.123665	1.11511	0.152649	1.11511	0.169404	1.2375	0.135895	0.992717	4.20018	440.548	0.429803	1.1892	0.530541	1.1892	0.588771	1.31972	0.472311	1.05868
	Ophthalmosaurus	1	0.387271	0.0107237	10.9918	1.45788	135.95	0.132634	1.19598	0.163721	1.19598	0.18169	1.32725	0.145751	1.06472	4.72303	440.429	0.429687	1.18888	0.530398	1.18888	0.588612	1.31936	0.472183	1.05839
	Tursiops	1	0.407	0.0116	11.89	1.31859	113.672	0.110899	1	0.136892	1	0.151917	1.10976	0.121868	0.890244	4.29732	370.458	0.361423	1	0.446134	1	0.4951	1.10976	0.397168	0.890244
BODY LENGTH = 2 m						Velocity =	1 m/s									Velocity =	2.5 m/s									Velocity =	5 m/s
						Re =	1.99321e+06									Re =	4.98303e+06									Re =	9.96605e+06
								COTdrag		COTnet (mean)		COTnet (upper limit)		COTnet (lower limit)				COTdrag		COTnet (mean)		COTnet (upper limit)		COTnet (lower limit)				COTdrag		COTnet (mean)		COTnet (upper limit)		COTnet (lower limit)
		Length (m)	Wetted area (m^2)	Volume (m^3)	Mass (kg)	Drag (N)	D/V	Absolute (J/kg m)	Relative	Absolute (J/kg m)	Relative	Absolute (J/kg m)	Relative	Absolute (J/kg m)	Relative	Drag (N)	D/V	Absolute (J/kg m)	Relative	Absolute (J/kg m)	Relative	Absolute (J/kg m)	Relative	Absolute (J/kg m)	Relative	Drag (N)	D/V	Absolute (J/kg m)	Relative	Absolute (J/kg m)	Relative	Absolute (J/kg m)	Relative	Absolute (J/kg m)	Relative
	Cartorhynchus short	2	0.939135	0.0351145	35.9924	2.59917	74.0197	0.0722144	1.59773	0.150835	2.70355	0.16794	3.01013	0.13373	2.39696	13.6466	388.632	0.379153	1.52314	0.791943	2.28506	0.881751	2.86961	0.702135	2.28506	48.8352	1390.74	1.35682	1.53705	2.51263	2.30592	2.83401	2.60086	3.15539	2.89581
	Cartorhynchus long	2	0.756507	0.0231484	23.7271	2.18103	94.2195	0.0919215	2.03375	0.191998	3.44133	0.213771	3.83159	0.170225	3.05108	10.8415	468.349	0.456926	1.83558	0.954389	2.75378	1.06262	3.45823	0.84616	2.75378	38.9759	1683.74	1.64267	1.86087	3.04199	2.79173	3.43108	3.14881	3.82017	3.50589
	Cartorhynchus	2	0.847821	0.0291315	29.8597	2.3901	84.1196	0.0820679	1.81574	0.171417	3.07244	0.190856	3.42086	0.151978	2.72402	12.2441	428.491	0.41804	1.67936	0.873166	2.51942	0.972185	3.16392	0.774147	2.51942	43.9055	1537.24	1.49975	1.69896	2.77731	2.54883	3.13255	2.87484	3.48778	3.20085
	Utatsusaurus	2	0.864349	0.0298878	30.635	2.47401	82.7767	0.0807577	1.78675	0.16868	3.02339	0.187809	3.36625	0.149551	2.68053	13.0352	436.137	0.4255	1.70933	0.888748	2.56438	0.989534	3.22038	0.787963	2.56438	46.4201	1553.15	1.51526	1.71654	2.80604	2.5752	3.16496	2.90458	3.52387	3.23397
	Chaohusaurus	2	0.801082	0.0253524	25.9862	2.58804	102.083	0.0995931	2.20348	0.208022	3.72854	0.231612	4.15137	0.184432	3.30572	13.2515	522.692	0.509943	2.04856	1.06513	3.0733	1.18591	3.85949	0.94434	3.0733	47.6983	1881.41	1.83552	2.07934	3.39912	3.11948	3.83389	3.51848	4.26866	3.91749
	Mixosaurus	2	1.09585	0.0458857	47.0328	3.17334	69.1577	0.0674709	1.49278	0.140928	2.52596	0.156909	2.81241	0.124946	2.23951	17.1957	374.752	0.365612	1.46875	0.763659	2.20345	0.85026	2.76712	0.677059	2.20345	60.1623	1311.14	1.27916	1.44907	2.36881	2.17393	2.6718	2.45199	2.97478	2.73005
	Shonisaurus	2	1.33424	0.070738	72.5065	4.14246	58.5606	0.0571323	1.26404	0.119333	2.13891	0.132866	2.38146	0.105801	1.89635	22.52	318.358	0.310593	1.24772	0.648741	1.87187	0.722309	2.35072	0.575172	1.87187	79.27	1120.61	1.09328	1.2385	2.0246	1.85804	2.28356	2.09569	2.54252	2.33335
	Guizhouichthyosaurus	2	1.25288	0.052276	53.5829	3.80294	72.7474	0.070973	1.57027	0.148243	2.65707	0.165054	2.95839	0.131432	2.35576	19.9989	382.563	0.373232	1.49936	0.779576	2.24938	0.867981	2.8248	0.69117	2.24938	71.5303	1368.32	1.33495	1.51227	2.47212	2.26875	2.78833	2.55894	3.10453	2.84912
	Temnodontosaurus	2	1.26356	0.0586582	60.1247	3.38208	57.6574	0.0562512	1.24455	0.0694354	1.24455	0.0770564	1.38114	0.0618145	1.10795	18.19	310.101	0.302538	1.21536	0.373447	1.08197	0.414436	1.34876	0.332459	1.08197	64.49	1099.42	1.0726	1.21508	1.17869	1.08172	1.324	1.21508	1.46932	1.34844
	Stenopteryigius	2	1.4328	0.0762719	78.1787	4.20018	55.0685	0.0537254	1.18866	0.0663176	1.18866	0.0735964	1.31913	0.0590389	1.0582	22.3639	293.213	0.286061	1.14917	0.353109	1.02305	0.391865	1.2753	0.314353	1.02305	80.9351	1061.14	1.03526	1.17277	1.13765	1.04405	1.2779	1.17277	1.41816	1.30149
	Ophthalmosaurus	2	1.54967	0.0857899	87.9347	4.72303	55.0534	0.0537107	1.18834	0.0662995	1.18834	0.0735763	1.31877	0.0590227	1.05791	25.019	291.631	0.284518	1.14297	0.351204	1.01752	0.38975	1.26842	0.312657	1.01752	89.6784	1045.33	1.01983	1.1553	1.12069	1.0285	1.25886	1.1553	1.39703	1.2821
	Tursiops	2	1.62635	0.0927585	95.0774	4.29732	46.328	0.0451981	1	0.0557917	1	0.0619152	1.10976	0.0496682	0.890244	23.6674	255.151	0.248928	1	0.307272	0.890244	0.340997	1.10976	0.273547	0.890244	83.929	904.812	0.882743	1	0.970048	0.890244	1.08964	1	1.20924	1.10976
BODY LENGTH = 10 m						Velocity =	1 m/s									Velocity =	2.5 m/s									Velocity =	5 m/s
						Re =	9.96605e+06									Re =	2.49151e+07									Re =	4.98303e+07
								COTdrag		COTnet (mean)		COTnet (upper limit)		COTnet (lower limit)				COTdrag		COTnet (mean)		COTnet (upper limit)		COTnet (lower limit)				COTdrag		COTnet (mean)		COTnet (upper limit)		COTnet (lower limit)
		Length (m)	Wetted area (m^2)	Volume (m^3)	Mass (kg)	Drag (N)	D/V	Absolute (J/kg m)	Relative	Absolute (J/kg m)	Relative	Absolute (J/kg m)	Relative	Absolute (J/kg m)	Relative	Drag (N)	D/V	Absolute (J/kg m)	Relative	Absolute (J/kg m)	Relative	Absolute (J/kg m)	Relative	Absolute (J/kg m)	Relative	Drag (N)	D/V	Absolute (J/kg m)	Relative	Absolute (J/kg m)	Relative	Absolute (J/kg m)	Relative	Absolute (J/kg m)	Relative
	Cartorhynchus short	10	23.4784	4.38931	4499.05	48.8352	11.1259	0.0108546	1.53705	0.0226721	2.60086	0.0252432	2.89581	0.020101	2.30592	268.492	61.1695	0.0596775	1.55325	0.124649	2.33022	0.138785	2.92633	0.110514	2.33022	1001.86	228.25	0.222683	1.55841	0.412376	2.33796	0.465122	2.637	0.517868	2.93604
	Cartorhynchus long	10	18.9127	2.89355	2965.89	38.9759	13.4699	0.0131414	1.86087	0.0274486	3.14881	0.0305614	3.50589	0.0243359	2.79173	214.415	74.1009	0.0722936	1.88161	0.151001	2.82284	0.168125	3.54496	0.133877	2.82284	800.166	276.534	0.26979	1.88807	0.49961	2.83253	0.563514	3.19483	0.627417	3.55714
	Cartorhynchus	10	21.1955	3.64143	3732.47	43.9055	12.2979	0.011998	1.69896	0.0250604	2.87484	0.0279023	3.20085	0.0222185	2.54883	241.453	67.6352	0.0659856	1.71743	0.137825	2.57653	0.153455	3.23564	0.122196	2.57653	901.014	252.392	0.246236	1.72324	0.455993	2.58525	0.514318	2.91592	0.572642	3.24659
	Utatsusaurus	10	21.6087	3.73598	3829.38	46.4201	12.4252	0.0121221	1.71654	0.0253197	2.90458	0.028191	3.23397	0.0224484	2.5752	252.914	67.6968	0.0660457	1.71899	0.137951	2.57888	0.153595	3.23859	0.122307	2.57888	943.619	252.576	0.246416	1.7245	0.456326	2.58713	0.514693	2.91805	0.573061	3.24896
	Chaohusaurus	10	20.027	3.16905	3248.27	47.6983	15.0513	0.0146842	2.07934	0.0306711	3.51848	0.0341493	3.91749	0.027193	3.11948	262.765	82.9159	0.0808936	2.10544	0.168964	3.15864	0.188125	3.96667	0.149803	3.15864	976.216	308.047	0.300534	2.10323	0.556544	3.15532	0.62773	3.55891	0.698916	3.96249
	Mixosaurus	10	27.3964	5.74338	5886.96	60.1623	10.4751	0.0102196	1.44713	0.0213458	2.44872	0.0237665	2.72641	0.0189252	2.17103	329.52	57.3739	0.0559745	1.45687	0.116915	2.18563	0.130173	2.74474	0.103656	2.18563	1231.65	214.448	0.209217	1.46417	0.38744	2.19658	0.436996	2.47754	0.486552	2.7585
	Shonisaurus	10	33.356	8.84225	9063.31	79.27	8.96491	0.00874626	1.2385	0.0182684	2.09569	0.0203401	2.33335	0.0161968	1.85804	431.45	48.7941	0.047604	1.23901	0.0994313	1.85879	0.110707	2.33429	0.0881556	1.85879	1612.73	182.39	0.177941	1.24529	0.32952	1.86821	0.371668	2.10717	0.413816	2.34613
	Guizhouichthyosaurus	10	31.322	6.5345	6697.86	71.5303	10.9466	0.0106796	1.51227	0.0223066	2.55894	0.0248362	2.84912	0.019777	2.26875	397.352	60.8084	0.0593253	1.54408	0.123914	2.31647	0.137966	2.90905	0.109862	2.31647	1471.85	225.243	0.21975	1.53788	0.406944	2.30716	0.458995	2.60227	0.511046	2.89737
	Temnodontosaurus	10	31.5891	7.33228	7515.59	64.49	8.79536	0.00858084	1.21508	0.010592	1.21508	0.0117546	1.34844	0.00942949	1.08172	349.79	47.7055	0.046542	1.21136	0.0574506	1.07841	0.0637561	1.34432	0.051145	1.07841	1308.55	178.464	0.174112	1.21849	0.191331	1.08475	0.21492	1.21849	0.238509	1.35222
	Stenopteryigius	10	35.8199	9.53399	9772.34	88.0397	9.23429	0.00900907	1.27572	0.0111206	1.27572	0.0123412	1.41574	0.00990007	1.1357	454.008	47.62	0.0464585	1.20919	0.0573476	1.07648	0.0636418	1.34191	0.0510533	1.07648	1646.39	172.686	0.168474	1.17903	0.185136	1.04963	0.207961	1.17903	0.230787	1.30844
	Ophthalmosaurus	10	38.7271	10.7237	10991.8	89.6784	8.36261	0.00815864	1.1553	0.0100709	1.1553	0.0111762	1.2821	0.00896554	1.0285	500.482	46.6705	0.0455322	1.18508	0.0562041	1.05501	0.0623729	1.31515	0.0500354	1.05501	1834.48	171.067	0.166895	1.16798	0.183401	1.03979	0.206012	1.16798	0.228623	1.29618
	Tursiops	10	40.6588	11.5948	11884.7	83.929	7.2385	0.00706195	1	0.00871714	1	0.0096739	1.10976	0.00776038	0.890244	456.623	39.3817	0.0384211	1	0.0474264	0.890244	0.0526317	1.10976	0.042221	0.890244	1698.22	146.464	0.142892	1	0.157024	0.890244	0.176383	1	0.195742	1.10976

## Sheet: Same volume
SAME BODY VOLUME, SAME VELOCITY. FULL MODELS
BODY VOLUME = 0.1 m3						Velocity =	1 m/s
						Re =	Variable
									COTdrag (J/kg m)		COTnet (mean)		COTnet (upper limit)		COTnet (lower limit)
		Length (m)	Wetted area (m^2)	Volume (m^3)	Mass (kg)	Drag (N)	Re	D/V	Absolute	Relative	Absolute (J/kg m)	Relative	Absolute (J/kg m)	Relative	Absolute (J/kg m)	Relative
	Cartorhynchus short	2.83488	1.88685	0.1	102.5	4.84	2.82526e+06	48.4	0.0472195	1.07714	0.0986282	1.82265	0.109813	2.02934	0.0874435	1.61596
	Cartorhynchus long	3.25729	2.00662	0.1	102.5	4.96378	3.24623e+06	49.6378	0.0484272	1.10469	0.101151	1.86926	0.112621	2.08124	0.0896799	1.65728
	Cartorhynchus	3.04608	1.94674	0.1	102.5	4.90189	3.03574e+06	49.0189	0.0478233	1.09092	0.0998894	1.84596	0.111217	2.05529	0.0885617	1.63662
	Utatsusaurus	3.16002	1.99985	0.1	102.5	5.79	3.1493e+06	57.9	0.0564878	1.28856	0.117987	2.1804	0.131367	2.42766	0.104607	1.93314
	Chaohusaurus	2.99134	1.93357	0.1	102.5	5.11	2.98118e+06	51.1	0.0498537	1.13723	0.10413	1.92432	0.115939	2.14255	0.0923216	1.7061
	Mixosaurus	2.59301	1.84205	0.1	102.5	5.06208	2.58421e+06	50.6208	0.0493862	1.12657	0.103154	1.90628	0.114852	2.12246	0.0914559	1.6901
	Shonisaurus	2.24463	1.68061	0.1	102.5	5.078	2.23702e+06	50.78	0.0495414	1.13011	0.103478	1.91227	0.115213	2.12913	0.0917434	1.69542
	Guizhouichthyosaurus	2.48298	1.93105	0.1	102.5	5.59	2.47455e+06	55.9	0.0545366	1.24405	0.113911	2.10508	0.126829	2.3438	0.100994	1.86636
	Temnodontosaurus	2.38921	1.8032	0.1	102.5	4.66777	2.3811e+06	46.6777	0.0455392	1.03881	0.0562128	1.03881	0.0623825	1.15283	0.0500431	0.924796
	Stenopteryigius	2.18898	1.71636	0.1	102.5	4.90876	2.18155e+06	49.0876	0.0478903	1.09244	0.059115	1.09244	0.0656032	1.21235	0.0526267	0.972542
	Ophthalmosaurus	2.10575	1.71723	0.1	102.5	5.20042	2.0986e+06	52.0042	0.0507358	1.15735	0.0626274	1.15735	0.0695012	1.28438	0.0557537	1.03033
	Tursiops	2.05075	1.71166	0.1	102.5	4.49337	2.04379e+06	44.9337	0.0438378	1	0.0541126	1	0.0600518	1.10976	0.0481734	0.890244
BODY VOLUME = 0.5 m3						Velocity =	1 m/s
						Re =	Variable
									COTdrag (J/kg m)		COTnet (mean)		COTnet (upper limit)		COTnet (lower limit)
		Length (m)	Wetted area (m^2)	Volume (m^3)	Mass (kg)	Drag (N)	Re	D/V	Absolute	Relative	Absolute (J/kg m)	Relative	Absolute (J/kg m)	Relative	Absolute (J/kg m)	Relative
	Cartorhynchus short	4.84757	5.51718	0.5	512.5	12.8918	4.83112e+06	25.7836	0.0251547	1.08099	0.0525411	1.82916	0.0584993	2.03659	0.0465828	1.62173
	Cartorhynchus long	5.56989	5.8674	0.5	512.5	13.2274	5.55098e+06	26.4548	0.0258095	1.10913	0.0539088	1.87678	0.0600222	2.08961	0.0477954	1.66395
	Cartorhynchus	5.20873	5.69229	0.5	512.5	13.0596	5.19105e+06	26.1192	0.0254821	1.09506	0.0532249	1.85297	0.0592607	2.0631	0.0471891	1.64284
	Utatsusaurus	5.40356	5.8476	0.5	512.5	15.2419	5.38522e+06	30.4839	0.0297403	1.27805	0.0621191	2.16261	0.0691636	2.40786	0.0550747	1.91737
	Chaohusaurus	5.11511	5.65379	0.5	512.5	13.6116	5.09775e+06	27.2232	0.0265592	1.14135	0.0554747	1.93129	0.0617656	2.1503	0.0491837	1.71228
	Mixosaurus	4.43399	5.38619	0.5	512.5	13.4424	4.41893e+06	26.8849	0.0262291	1.12716	0.0547852	1.90729	0.060998	2.12358	0.0485725	1.691
	Shonisaurus	3.83827	4.91412	0.5	512.5	13.4706	3.82524e+06	26.9412	0.0262841	1.12952	0.0549	1.91128	0.0611257	2.12803	0.0486742	1.69454
	Guizhouichthyosaurus	4.24583	5.64643	0.5	512.5	14.8566	4.23142e+06	29.7133	0.0289885	1.24574	0.0605488	2.10794	0.0674152	2.34699	0.0536825	1.8689
	Temnodontosaurus	4.08549	5.27259	0.5	512.5	12.4234	4.07162e+06	24.8468	0.0242408	1.04171	0.0299224	1.04171	0.0332065	1.15605	0.0266382	0.92738
	Stenopteryigius	3.7431	5.01866	0.5	512.5	13.0658	3.7304e+06	26.1316	0.0254943	1.09558	0.0314697	1.09558	0.0349237	1.21583	0.0280157	0.975336
	Ophthalmosaurus	3.60078	5.0212	0.5	512.5	13.7115	3.58855e+06	27.423	0.0267542	1.14973	0.0330249	1.14973	0.0366496	1.27592	0.0294002	1.02354
	Tursiops	3.50673	5.00494	0.5	512.5	11.9259	3.49482e+06	23.8518	0.0232701	1	0.0287241	1	0.0318768	1.10976	0.0255715	0.890244

## Sheet: Life-size dimensions
LIFE-SIZE DIMENSIONS SAME SPEED, SAME VELOCITY. FULL MODELS
BODY LENGTH = Life-size dimensions (from Data S3)								Velocity =	1 m/s
								Re =	Variable
										COTdrag		COTnet
		Length (m)	St.Dev. of length in sample	Wetted area (m^2)	Volume (m^3)	Mass (kg)	Re	Drag (N)	D/V	Absolute (J/kg m)	Relative	Absolute (J/kg m)	Relative
	Cartorhynchus short	0.4		0.0375654	0.000280896	0.287918	398642	0.164103	584.212	0.569963	16.4545	1.18742	27.767
	Cartorhynchus long	0.47		0.0417781	0.000300412	0.307922	468405	0.172625	574.628	0.560612	16.1846	1.16794	27.3115
	Cartorhynchus	0.435	NA	0.0396718	0.000290654	0.29792	433523	0.168364	579.42	0.565288	16.3195	1.17768	27.5392
	Utatsusaurus	2.562	NA	1.41836	0.0628264	64.397	2.5533e+06	3.86142	61.4617	0.0599627	1.73109	0.124922	2.92121
	Chaohusaurus	0.832	0.138177	0.138632	0.00182515	1.87078	829176	0.657684	360.345	0.351556	10.1492	0.732408	17.1268
	Mixosaurus	0.85	0.103465	0.197939	0.00352244	3.6105	847115	0.696208	197.649	0.192828	5.56685	0.401726	9.39406
	Shonisaurus	17.25	5.3033	99.2551	45.3869	46521.5	1.71914e+07	213.027	4.69359	0.00457911	0.132196	0.00953981	0.223081
	Guizhouichthyosaurus	5.5	0.416333	9.4749	1.08726	1114.44	5.48133e+06	23.8854	21.9685	0.0214326	0.618749	0.0446513	1.04414
	Temnodontosaurus	7.63	0.979158	18.3902	3.25696	3338.39	7.6041e+06	39.2375	12.0473	0.0117534	0.339315	0.0145104	0.339315
	Stenopteryigius	2.5	0.690683	2.23874	0.148969	152.693	2.49151e+06	8.14469	54.6739	0.0533403	1.53991	0.0658523	1.53991
	Ophthalmosaurus	4.21	0.127279	6.86404	0.800186	820.191	4.19571e+06	18.4356	23.0391	0.0224772	0.648903	0.0277496	0.648903
	Tursiops	2.5	Reference	2.54375	0.18125	185.781	2.49151e+06	6.43522	35.5047	0.0346387	1	0.0427638	1
								Velocity =	1 m/s
Upper limit calculation								Re =	Variable
										COTdrag		COTnet
		Length (m)		Wetted area (m^2)	Volume (m^3)	Mass (kg)	Re	Drag (N)	D/V	Absolute (J/kg m)	Relative	Absolute (J/kg m)	Relative
	Cartorhynchus	0.4		0.0375654	0.000280896	0.287918	398642	0.164103	584.212	0.569963	16.4545	1.3255	30.9957
	Utatsusaurus	2.562		1.41836	0.0628264	64.397	2.5533e+06	3.86142	61.4617	0.0599627	1.73109	0.139448	3.26089
	Chaohusaurus	0.693823		0.0964082	0.00105846	1.08492	691467	0.452344	427.36	0.416937	12.0367	0.969621	22.6739
	Mixosaurus	0.746535		0.152684	0.00238637	2.44603	744001	0.557251	233.514	0.227819	6.577	0.529811	12.3892
	Shonisaurus	11.9467		47.6069	15.0767	15453.6	1.19061e+07	109.544	7.26577	0.00708856	0.204643	0.016485	0.38549
	Guizhouichthyosaurus	5.08367		8.09475	0.858572	880.037	5.06641e+06	20.6439	24.0445	0.023458	0.677221	0.0545536	1.2757
	Temnodontosaurus	6.65084		13.973	2.15709	2211.02	6.62827e+06	30.989	14.3661	0.0140157	0.404625	0.0191996	0.448968
	Stenopteryigius	1.80932		1.17261	0.0564701	57.8818	1.80317e+06	3.4363	60.8517	0.0593675	1.71391	0.0813253	1.90173
	Ophthalmosaurus	4.08272		6.45528	0.729783	748.027	4.06886e+06	17.3146	23.7257	0.023147	0.668241	0.0317082	0.741473
								Velocity =	1 m/s
Lower limit calculation								Re =	Variable
										COTdrag		COTnet
		Length (m)		Wetted area (m^2)	Volume (m^3)	Mass (kg)	Re	Drag (N)	D/V	Absolute (J/kg m)	Relative	Absolute (J/kg m)	Relative
	Cartorhynchus	0.47		0.0417781	0.000300412	0.307922	468405	0.172625	574.628	0.560612	16.1846	1.03817	24.2769
	Utatsusaurus	2.562		1.41836	0.0628264	64.397	2.5533e+06	3.86142	61.4617	0.0599627	1.73109	0.111042	2.59663
	Chaohusaurus	0.970177		0.188503	0.00289389	2.96624	966884	0.833144	287.897	0.280875	8.10872	0.52014	12.1631
	Mixosaurus	0.953465		0.249059	0.00497166	5.09595	950228	0.838041	168.564	0.164452	4.74765	0.304541	7.12147
	Shonisaurus	22.5533		169.666	101.436	103972	2.24767e+07	351.026	3.46056	0.00337615	0.0974677	0.00625214	0.146202
	Guizhouichthyosaurus	5.91633		10.9636	1.35333	1387.16	5.89625e+06	27.486	20.3099	0.0198146	0.572036	0.0366936	0.858053
	Temnodontosaurus	8.60916		23.4131	4.67866	4795.62	8.57993e+06	48.6227	10.3924	0.010139	0.292706	0.0111417	0.260541
	Stenopteryigius	3.19068		3.64663	0.309689	317.431	3.17985e+06	9.5055	30.6937	0.0299451	0.864498	0.0329067	0.769498
	Ophthalmosaurus	4.33728		7.28535	0.874977	896.852	4.32256e+06	19.1323	21.8661	0.0213327	0.615865	0.0234426	0.548187
