# Supplementary material for: Effects of body plan evolution on the hydrodynamic drag and energy requirements of swimming in ichthyosaurs
Source: PubMed Central journal article supplement (PMC6458325; doi:10.1098/rspb.2018.2786), 2019-03-06
Supplement: rspb20182786supp4.pdf [file rspb20182786supp4.pdf]

**Data S3. List of ichthyosaur body lengths.** Data on total body length (i.e. total length from the tip of the rostrum to the tip of the tail) was collected from the literature or personal examination of specimens. The total length for each genus, shown in bold, has been calculated as the average of the estimations from all available specimens of that genus, and has been used to build the graph in Figure S6.

| Genus                       | species                 | Total body length (m) | Specimen                                | Reference                   | Comments                |
|-----------------------------|-------------------------|-----------------------|-----------------------------------------|-----------------------------|-------------------------|
| <i>Cartorhynchus</i>        | <i>lenticarpus</i>      | <b>0.4</b>            | AGM CH-628-16                           | Motani et al., 2015[1]      | Estimate from reference |
| <i>Sclerocormus</i>         | <i>parviceps</i>        | <b>1.6</b>            | AGB6265                                 | Jiang et al., 2016[2]       | Estimate from reference |
| <i>Chaohusaurus</i>         | sp.                     | 0.763                 | AGM I-1 CHS-5 composite                 | Motani et al., 2014[3]      | Fig. 3                  |
| <i>Chaohusaurus</i>         | sp.                     | 0.99                  | AGM L-4                                 | Jiang et al., 2016[2]       | Estimate from reference |
| <i>Chaohusaurus</i>         | <i>zhangjiawanensis</i> | 0.74                  | WHGMR V26001                            | Chen et al., 2013[4]        | Fig. 2                  |
| <i>Chaohusaurus</i>         |                         | <b>0.83</b>           |                                         |                             |                         |
| <i>Utatusaurus</i>          | <i>hataii</i>           | 2.5                   | Reconstruction                          | Motani, 1998[5]             | Fig. 2                  |
| <i>Cymbospondylus</i>       | <i>petrinus</i>         | 9.3                   | UCMP 9950                               | Merriam, 1908[6]            | Estimate from reference |
| <i>Cymbospondylus</i>       | <i>buchseri</i>         | 5.5                   | PIMUZ T 4351                            | Sander, 1989[7]             | Estimate from reference |
| <i>Cymbospondylus</i>       |                         | 7.4                   |                                         |                             |                         |
| <i>Xinminosaurus</i>        | <i>catactes</i>         | 2.32                  | GMPKU-P-1071                            | Jiang et al., 2008 [8]      | Estimate from reference |
| <i>Mixosaurus</i>           | <i>cornalianus</i>      | 0.795                 |                                         | Fröbisch et al., 2013[9]    | Estimate from reference |
| <i>Mixosaurus</i>           | <i>cornalianus</i>      | 0.83                  | PIMUZ T4376                             | Schmitz et al., 2004[10]    | Estimate from reference |
| <i>Mixosaurus</i>           | <i>cornalianus</i>      | 0.9                   | PIMUZ T2420                             | Reposi, 1902[11]            | Estimate from reference |
| <i>Mixosaurus</i>           | <i>panxianensis</i>     | 0.73                  | GMPKU-P-1039                            | Jiang et al., 2006[12]      | Estimate from reference |
| <i>Mixosaurus</i>           | <i>xindianensis</i>     | 1                     | YIGM SPC V-0732                         | Chen & Cheng, 2010[13]      | Estimate from reference |
| <i>Mixosaurus</i>           |                         | <b>0.85</b>           |                                         |                             |                         |
| <i>Phalarodon</i>           | <i>callawayi</i>        | <b>1.50</b>           | CMC VP 7275                             | Schmitz et al., 2004[10]    | Estimate from reference |
| <i>Besanosaurus</i>         | <i>leptorhynchus</i>    | <b>5.5</b>            | BES SC 999                              | Dal Sasso & Pinna, 1996[14] | Estimate from reference |
| <i>Shonisaurus</i>          | <i>popularis</i>        | 13.5                  | Reconstruction, based in BISP specimens | Kosch, 1990[15]             | Fig. 1                  |
| <i>Shonisaurus</i>          | <i>sikanniensis</i>     | 21                    | TMP 94.378.2                            | Nichols & Manabe, 2004 [16] | Estimate from reference |
| <i>Shonisaurus</i>          |                         | <b>17.25</b>          |                                         |                             |                         |
| <i>Shastasaurus</i>         | <i>lingae</i>           | 8.3                   | YGMIR SPCV03109                         | Sander, 2011[17]            | Estimate from reference |
| <i>Shastasaurus</i>         | <i>lingae</i>           | 7                     | YGMIR SPCV03107                         | Sander, 2011[17]            | Estimate from reference |
| <i>Shastasaurus</i>         |                         | <b>7.65</b>           |                                         |                             |                         |
| <i>Guizhouichthyosaurus</i> | <i>tangae</i>           | 5.4                   | TR 00001                                | Chen & Cheng, 2003[18]      | Estimate from reference |
| <i>Guizhouichthyosaurus</i> | <i>tangae</i>           | 5.2                   | IVPP V 11853                            | Shang & Li, 2009[19]        | Estimate from reference |
| <i>Guizhouichthyosaurus</i> | <i>tangae</i>           | 6                     | Various specimens GNG                   | Maisch et al., 2006[20]     | Estimate from reference |
| <i>Guizhouichthyosaurus</i> |                         | <b>5.5</b>            |                                         |                             |                         |
| <i>Qianichthyosaurus</i>    | <i>zhoui</i>            | 1.21                  | V11838                                  | Li, 1999[21]                | Estimate from reference |

|                         |                      |             |                                                |                                |                         |
|-------------------------|----------------------|-------------|------------------------------------------------|--------------------------------|-------------------------|
| <i>Qianichthosaurus</i> | <i>zhoui</i>         | 1.6         | V11839, holotype                               | Li, 1999[21]                   | Estimate from reference |
| <i>Qianichthosaurus</i> | <i>zhoui</i>         | 1.5         | CMNH<br>V1412/C1120                            | Nichols et al.,<br>2002[22]    | Estimate from reference |
| <i>Qianichthosaurus</i> | <i>xingyiensis</i>   | 1.3         | WS2011-46-R1                                   | Yang et al.,<br>2013[23]       | Estimate from reference |
| <i>Qianichthosaurus</i> |                      | <b>1.40</b> |                                                |                                |                         |
| <i>Suevoleviathan</i>   | <i>integer</i>       | 4.3         | SMNS 15390                                     | Maxwell, 2018[24]              | Estimate from reference |
| <i>Suevoleviathan</i>   | <i>integer</i>       | 2.62        | MCZ 1042                                       | Maxwell, 2018[24]              | Estimate from reference |
| <i>Suevoleviathan</i>   |                      | <b>3.46</b> |                                                |                                |                         |
| <i>Temnodontosaurus</i> | <i>platyodon</i>     | 6.38        | BMNH R 2003                                    | McGowan,<br>1974[25]           | Estimate from reference |
| <i>Temnodontosaurus</i> | <i>trigonodon</i>    | 7.27        | GPIT/RE/9409<br>(former 1491/13)               | McGowan,<br>1996[26]           | Estimate from reference |
| <i>Temnodontosaurus</i> | <i>trigonodon</i>    | 7.7         | SMNS 15950                                     | Maxwell & Vincent,<br>2016[27] | Estimate from reference |
| <i>Temnodontosaurus</i> | <i>trigonodon</i>    | 9.09        | SMNS 50000                                     | McGowan,<br>1996[26]           | Estimate from reference |
| <i>Temnodontosaurus</i> | <i>trigonodon</i>    | 7.71        | SMNS 52340                                     | McGowan,<br>1996[26]           | Estimate from reference |
| <i>Temnodontosaurus</i> |                      | <b>7.63</b> |                                                |                                |                         |
| <i>Leptonectes</i>      | <i>tenuirostris</i>  | 1.33        | BMNH R498                                      | McGowan,<br>1974[25]           | Fig. 12                 |
| <i>Leptonectes</i>      | <i>tenuirostris</i>  | 1.73        | BGS 51236                                      | McGowan &<br>Motani, 2003[28]  | Fig. 72                 |
| <i>Leptonectes</i>      | <i>tenuirostris</i>  | 2.17        | M 3564                                         | Personal<br>observation        |                         |
| <i>Leptonectes</i>      | <i>tenuirostris</i>  | 3.8         | DLR 002                                        | McGowan,<br>1993[29]           | Estimate from reference |
| <i>Leptonectes</i>      | <i>solei</i>         | 8           | BRSMG Ce 9856                                  | McGowan,<br>1993[29]           | Estimate from reference |
| <i>Leptonectes</i>      | <i>solei</i>         | 5.6         | MHN 96270                                      | McGowan,<br>1993[29]           | Fig. 5                  |
| <i>Leptonectes</i>      |                      | <b>3.77</b> |                                                |                                |                         |
| <i>Hauffiopteryx</i>    | <i>typicus</i>       | 1.93        | GPIT/RE/9417<br>(former 1491/4)                | Von Huene,<br>1931[30]         | Estimate from reference |
| <i>Hauffiopteryx</i>    | <i>typicus</i>       | 1.55        | Composite                                      | Caine & Benton,<br>2011[31]    | Fig. 17                 |
| <i>Hauffiopteryx</i>    |                      | <b>1.74</b> |                                                |                                |                         |
| <i>Excalibosaurus</i>   | <i>costini</i>       | 5.7         | ROM 47697                                      | McGowan &<br>Motani, 2003[28]  | Fig. 2                  |
| <i>Eurhinosaurus</i>    | <i>longirostris</i>  | 5.5         | Lias $\epsilon$ II,9/10.<br>Frankfurt          | Von Huene,<br>1931[30]         | Estimate from reference |
| <i>Eurhinosaurus</i>    | <i>longirostris</i>  | 3.8         | MB R 4004                                      | Personal<br>observation        |                         |
| <i>Eurhinosaurus</i>    |                      | <b>4.65</b> |                                                |                                |                         |
| <i>Stenopterygius</i>   | <i>quadriscissus</i> | 3.15        | GPIT/RE/9283<br>(former 43/0219-1)             | Von Huene,<br>1931[30]         | Estimate from reference |
| <i>Stenopterygius</i>   | <i>quadriscissus</i> | 2.3         | Lias $\epsilon$ I,2. No 172.<br>Göttingen      | Von Huene,<br>1931[30]         | Estimate from reference |
| <i>Stenopterygius</i>   | <i>quadriscissus</i> | 2.5         | Lias $\epsilon$ I,2. No 121.<br>St. Petersburg | Von Huene,<br>1931[30]         | Estimate from reference |
| <i>Stenopterygius</i>   | <i>quadriscissus</i> | 1.8         | Lias $\epsilon$ I,2. No 317.<br>Berlin         | Von Huene,<br>1931[30]         | Estimate from reference |
| <i>Stenopterygius</i>   | <i>quadriscissus</i> | 2.5         | Lias $\epsilon$ I,2. No 224.                   | Von Huene,                     | Estimate from reference |

|                       |                      |             |                                          |                                |                         |
|-----------------------|----------------------|-------------|------------------------------------------|--------------------------------|-------------------------|
|                       |                      |             | Berlin                                   | 1931[30]                       |                         |
| <i>Stenopterygius</i> | <i>quadriscissus</i> | 2.9         | Lias $\epsilon$ I,2. No 127.<br>Bonn     | Von Huene,<br>1931[30]         | Estimate from reference |
| <i>Stenopterygius</i> | <i>quadriscissus</i> | 2.7         | Lias $\epsilon$ I,2. No 188.<br>Upsala   | Von Huene,<br>1931v[30]        | Estimate from reference |
| <i>Stenopterygius</i> | <i>quadriscissus</i> | 2.2         | Lias $\epsilon$ I,2. No 82               | Von Huene,<br>1931v[30]        | Estimate from reference |
| <i>Stenopterygius</i> | <i>quadriscissus</i> | 1.6         | Lias $\epsilon$ I,2. No 152              | Von Huene,<br>1931[30]         | Estimate from reference |
| <i>Stenopterygius</i> | <i>quadriscissus</i> | 1.3         | Lias $\epsilon$ I,2. No 272              | Von Huene,<br>1931[30]         | Estimate from reference |
| <i>Stenopterygius</i> | <i>quadriscissus</i> | 2.85        | Lias $\epsilon$ II, 4/5. No<br>276       | Von Huene,<br>1931[30]         | Estimate from reference |
| <i>Stenopterygius</i> | <i>quadriscissus</i> | 3.1         | MHH 1981/33                              | Maxwell & Vincent,<br>2016[27] | Estimate from reference |
| <i>Stenopterygius</i> | <i>quadriscissus</i> | 1.38        | NHM R4086                                | Personal<br>observation        |                         |
| <i>Stenopterygius</i> | <i>quadriscissus</i> | 2.75        | SMNS 3775                                | Von Huene,<br>1931[30]         | Estimate from reference |
| <i>Stenopterygius</i> | <i>quadriscissus</i> | 3.04        | SMNS 16811                               | Von Huene,<br>1931[30]         | Estimate from reference |
| <i>Stenopterygius</i> | <i>quadriscissus</i> | 2.85        | SMNS 50963                               | Maxwell, 2012[32]              | Estimate from reference |
| <i>Stenopterygius</i> | <i>quadriscissus</i> | 2.08        | SMNS 52036                               | Maxwell & Vincent,<br>2016[27] | Estimate from reference |
| <i>Stenopterygius</i> | <i>quadriscissus</i> | 2.32        | SMF 457                                  | Lingham-Soliar,<br>2016[33]    | Estimate from reference |
| <i>Stenopterygius</i> | <i>triscissus</i>    | 3.33        | SMNS 14846                               | Maxwell, 2012[32]              | Estimate from reference |
| <i>Stenopterygius</i> | <i>triscissus</i>    | 2.2         | GPIT/RE/9416<br>(former 12/0224-2)       | Von Huene,<br>1931[30]         | Estimate from reference |
| <i>Stenopterygius</i> | <i>uniter</i>        | 3.75        | SMNS 17500                               | Maxwell, 2012[32]              | Estimate from reference |
| <i>Stenopterygius</i> | <i>uniter</i>        | 3.17        | SMNS 4865                                | Von Huene,<br>1931[30]         | Estimate from reference |
| <i>Stenopterygius</i> | sp.                  | 2.07        | Lias $\epsilon$ II,4. No 4               | Von Huene,<br>1931[30]         | Estimate from reference |
| <i>Stenopterygius</i> | sp.                  | 2.36        | Lias $\epsilon$ II,10. No 6              | Von Huene,<br>1931[30]         | Estimate from reference |
| <i>Stenopterygius</i> | sp.                  | 2           | OUM JZ 163                               | Von Huene,<br>1931[30]         | Estimate from reference |
| <i>Stenopterygius</i> | sp.                  | 1.2         | Lias $\epsilon$ II,6. No 287             | Von Huene,<br>1931[30]         | Estimate from reference |
| <i>Stenopterygius</i> | sp.                  | 1.9         | Lias $\epsilon$ II,6. No 326             | Von Huene,<br>1931[30]         | Estimate from reference |
| <i>Stenopterygius</i> | sp.                  | 1.7         | Lias $\epsilon$ II,6. No 105             | Von Huene,<br>1931[30]         | Estimate from reference |
| <i>Stenopterygius</i> | sp.                  | 3.33        | Lias $\epsilon$ II,10. No 275            | Von Huene,<br>1931[30]         | Estimate from reference |
| <i>Stenopterygius</i> | sp.                  | 2.5         | Lias $\epsilon$ II,11. No 233            | Von Huene,<br>1931[30]         | Estimate from reference |
| <i>Stenopterygius</i> | sp.                  | 3.4         | Lias $\epsilon$ II,10. No 132.<br>Upsala | Von Huene,<br>1931[30]         | Estimate from reference |
| <i>Stenopterygius</i> | sp.                  | 3.7         | Lias $\epsilon$ II,10. No 186            | Von Huene,<br>1931[30]         | Estimate from reference |
| <i>Stenopterygius</i> |                      | <b>2.50</b> |                                          |                                |                         |
| <i>Ichthyosaurus</i>  | <i>communis</i>      | 0.87        | BMNH R1073                               | McGowan,<br>1974[25]           | Fig. 2                  |

|                        |                       |             |                                           |                                   |                         |
|------------------------|-----------------------|-------------|-------------------------------------------|-----------------------------------|-------------------------|
| <i>Ichthyosaurus</i>   | <i>communis</i>       | 1.58        | M3550                                     | Personal observation              |                         |
| <i>Ichthyosaurus</i>   | <i>somersetensis</i>  | 2.7         | NHMUK PV OR2013                           | Massare & Lomax, 2018[34]         | Estimate from reference |
| <i>Ichthyosaurus</i>   | <i>breviceps</i>      | 1.21        | BMNH 43006                                | McGowan, 1974[25]                 | Fig. 7                  |
| <i>Ichthyosaurus</i>   | <i>conybeari</i>      | 1.3         | BGS 956                                   | McGowan, 1974[25]                 | Estimate from reference |
| <i>Ichthyosaurus</i>   |                       | <b>1.53</b> |                                           |                                   |                         |
| <i>Ophthalmosaurus</i> | <i>icenicus</i>       | 4.12        | NHMUK PV R3702, R3893 and R4124 composite | Andrews, 1915[35]                 | Estimate from reference |
| <i>Ophthalmosaurus</i> | <i>icenicus</i>       | 4.30        | GPIT/RE/9410                              | Personal observation              |                         |
| <i>Ophthalmosaurus</i> |                       | <b>4.21</b> |                                           |                                   |                         |
| <i>Nannopterygius</i>  | <i>enthekiodon</i>    | 3.5         | BMNH 46497                                | McGowan & Motani, 2003[28]        | Fig. 91                 |
| <i>Undorosaurus</i>    | <i>gorodischensis</i> | <b>5</b>    | UPM No. EP-II-20 (527)                    | Arkhangelsky & Zverkov, 2014[36]  | Estimate from reference |
| <i>Cryopterygius</i>   | <i>kristiansenae</i>  | 5.5         | PMO 214.578                               | Druckenmiller et al. 2012[37]     | Estimate from reference |
| <i>Cryopterygius</i>   | <i>kielanae</i>       | 4           | GMUL 3579-81                              | Tyborowski, 2016[38]              | Estimate from reference |
| <i>Cryopterygius</i>   |                       | <b>4.75</b> |                                           |                                   |                         |
| <i>Platypterygius</i>  | <i>platydactylus</i>  | 4.5         | Holotype                                  | McGowan & Motani, 2003[28]        | Fig. 95                 |
| <i>Platypterygius</i>  | <i>australis</i>      | 5.6         | F 2453                                    | Wade, 1984[39]                    | Estimate from reference |
| <i>Platypterygius</i>  | <i>hercynicus</i>     | 4.65        | SGS specimen                              | Kolb and Sander, 2009[40]         | Estimate from reference |
| <i>Platypterygius</i>  |                       | <b>4.92</b> |                                           |                                   |                         |
| <i>Athabascasaurus</i> | <i>bituminensis</i>   | <b>3.5</b>  | TMP 200.29.01                             | Druckenmiller & Maxwell, 2010[41] | Estimate from reference |

## References

1. Motani R, Jiang D-Y, Chen G-B, Tintori A, Rieppel O, Ji C, Huang J-D. 2015 A basal ichthyosauriform with a short snout from the Lower Triassic of China. *Nature* **517**, 485–488. (doi:10.1038/nature13866)
2. Jiang D-Y *et al.* 2016 A large aberrant stem ichthyosauriform indicating early rise and demise of ichthyosauromorphs in the wake of the end-Permian extinction. *Scientific Reports* **6**, 26232. (doi:10.1038/srep26232)
3. Motani R, Jiang D, Tintori A, Rieppel O, Chen G. 2014 Terrestrial origin of viviparity in Mesozoic marine reptiles Indicated by Early Triassic embryonic fossils. *PLoS ONE* **9**, e88640. (doi:10.1371/journal.pone.0088640)
4. Chen X, Sander PM, Cheng L, Wang X. 2013 A new Triassic primitive ichthyosaur from Yuanan, South China. *Acta Geologica Sinica* **87**, 672–677. (doi:10.1111/1755-6724.12078)
5. Motani R. 1998 Ichthyosaurian relationships illuminated by new primitive skeletons from Japan. *Nature* **393**, 255–257. (doi:10.1038/30473)

6. Merriam JC. 1908 Triassic Ichthyosauria, with special reference to the American forms. *Memoirs of the University of California* **1**, 1–196.
7. Sander PM. 1989 The large ichthyosaur *Cymbospondylus buchseri*, sp. nov., from the Middle Triassic of Monte San Giorgio (Switzerland), with a survey of the genus in Europe. *Journal of Vertebrate Paleontology* **9**, 163–173. (doi:10.1080/02724634.1989.10011750)
8. Jiang D, Motani R, Hao W, Schmitz L, Rieppel O, Sun Y, Sun Z. 2008 New primitive ichthyosaurian (Reptilia, Diapsida) from the Middle Triassic of Panxian, Guizhou, southwestern China and its position in the Triassic biotic recovery. *Progress in Natural Science* **18**, 1315–1319. (doi:10.1016/j.pnsc.2008.01.039)
9. Fröbisch NB, Fröbisch J, Sander PM, Schmitz L, Rieppel O. 2013 Macropredatory ichthyosaur from the Middle Triassic and the origin of modern trophic networks. *Proceedings of the National Academy of Sciences* **110**, 1393–1397. (doi:10.1073/pnas.1216750110)
10. Schmitz L, Sander PM, Storrs GW, Rieppel O. 2004 New Mixosauridae (Ichthyosauria) from the Middle Triassic of the Augusta Mountains (Nevada, USA) and their implications for mixosaur taxonomy. *Palaeontographica Abteilung A* **270**, 133–162.
11. Repositi E. 1902 Il mixosauro delgi strati Triasici di Besano in Lombardia.pdf. *Atti della Società italiana di scienze naturali e del Museo civico di storia naturale di Milano* **41**, 361–371.
12. Jiang D, Schmitz L, Hao W-C, Sun Y-L. 2006 A new mixosaurid ichthyosaur from the Middle Triassic of China. *Journal of Vertebrate Paleontology* **26**, 60–69. (doi:10.1671/0272-4634(2006)26[60:ANMIFT]2.0.CO;2)
13. Chen X, Cheng L. 2010 A new species of *Mixosaurus* (Reptilia: Ichthyosauria) from the Middle Triassic of Pu'an, Guizhou, China. *Acta Palaeontologica Sinica* **49**, 251–260.
14. Dal Sasso C, Pinna G. 1996 *Besanosaurus leptorhynchus* n.gen. n.sp., a new shastasaurid ichthyosaur from the Middle Triassic of Besano (Lombardy, N. Italy). *Paleontologia Lombarda* **4**, 1–23.
15. Kosch BF. 1990 A revision of the skeletal reconstruction of *Shonisaurus popularis* (Reptilia: Ichthyosauria). *Journal of Vertebrate Paleontology* **10**, 512–514. (doi:10.1080/02724634.1990.10011833)
16. Nicholls EL, Manabe M. 2004 Giant ichthyosaurs of the Triassic—a new species of *Shonisaurus* from the Pardonet Formation (Norian: Late Triassic) of British Columbia. *Journal of Vertebrate Paleontology* **24**, 838–849. (doi:10.1671/0272-4634(2004)024[0838:GIOTTN]2.0.CO;2)
17. Sander PM, Chen X, Cheng L, Wang X. 2011 Short-snouted toothless ichthyosaur from China suggests Late Triassic diversification of suction feeding ichthyosaurs. *PLoS ONE* **6**, e19480. (doi:10.1371/journal.pone.0019480)
18. Chen X, Cheng L. 2003 A new species of large-sized and long-body ichthyosaur from the Late Triassic Guanling biota, Guizhou, China. *Geological Bulletin of China* **22**, 228–235.
19. Shang Q-H, Li C. 2009 On the occurrence of the ichthyosaur *Shastasaurus* in the Guanling biota. *Vertebrata Palasiatica* **47**, 178–183.
20. Maisch MW, Pan X-R, Sun Z-Y, Cai T, Zhang D-P, Xie J-L. 2006 Cranial osteology of *Guizhouichthyosaurus tangae* (Reptilia: Ichthyosauria) from the Upper Triassic of China. *Journal of Vertebrate Paleontology* **26**, 588–597. (doi:10.1671/0272-4634(2006)26[588:COGTR]2.0.CO;2)
21. Li C. 1999 Ichthyosaur from Guizhou, China. *Chinese Science Bulletin* **44**, 1329–1333.

22. Nicholls EL, Wei C, Manabe M. 2002 New material of *Qianichthysaurus* Li, 1999 (Reptilia, Ichthyosauria) from the Late Triassic of southern China, and implications for the distribution of Triassic ichthyosaurs. *Journal of Vertebrate Paleontology* **22**, 759–765. (doi:10.1671/0272-4634(2002)022[0759:NMOQLR]2.0.CO;2)
23. Yang P, Ji C, Jiang D, Motani R, Tintori A, Sun Y, Sun Z. 2013 A new species of *Qianichthysaurus* (Reptilia Ichthyosauria) from Xingyi Fauna (Ladinian Middle Triassic) of Guizhou. *Acta Scientiarum Naturalium Universitatis Pekinensis* **49**, 1002–1008.
24. Maxwell EE. 2018 Redescription of the ‘lost’ holotype of *Suevoleviathan integer* (Bronn, 1844) (Reptilia: Ichthyosauria). *Journal of Vertebrate Paleontology* **38**, e1439833. (doi:10.1080/02724634.2018.1439833)
25. McGowan C. 1974 A revision of the longipinnate ichthyosaurs of the Lower Jurassic of England, with descriptions of two new species (Reptilia: Ichthyosauria). *Life sciences contributions, Royal Ontario Museum* **97**, 1–37.
26. McGowan C. 1996 Giant ichthyosaurs of the Early Jurassic. *Canadian Journal of Earth Sciences* **33**, 1011–1021. (doi:10.1139/e96-077)
27. Maxwell EE, Vincent P. 2016 Effects of the early Toarcian Oceanic Anoxic Event on ichthyosaur body size and faunal composition in the Southwest German Basin. *Paleobiology* **42**, 117–126. (doi:10.1017/pab.2015.34)
28. McGowan C, Motani R. 2003 *Handbook of Paleoherpetology: Ichthyopterygia*. München: F. Pfeil.
29. McGowan C. 1993 A new species of large, long-snouted ichthyosaur from the English lower Lias. *Canadian Journal of Earth Sciences* **30**, 1197–1204. (doi:10.1139/e93-101)
30. Von Huene F. 1931 Neue studien über ichthyosaurier aus Holzmaden. *Abhandlungen der Senckenbergischen Naturforschenden Gesellschaft* **42**, 345–382.
31. Caine H, Benton MJ. 2011 Ichthyosauria from the Upper Lias of Strawberry Bank, England. *Palaeontology* **54**, 1069–1093. (doi:10.1111/j.1475-4983.2011.01093.x)
32. Maxwell EE. 2012 New metrics to differentiate species of *Stenopterygius* (Reptilia: Ichthyosauria) from the Lower Jurassic of southwestern Germany. *Journal of Paleontology* **86**, 105–115. (doi:10.1666/11-038.1)
33. Lingham-Soliar T. 2016 Convergence in thunniform anatomy in lamnid sharks and Jurassic ichthyosaurs. *Integrative and Comparative Biology* **56**, 1323–1336. (doi:10.1093/icb/icw125)
34. Massare JA, Lomax DR. 2018 A taxonomic reassessment of *Ichthyosaurus communis* and *I. intermedius* and a revised diagnosis for the genus. *Journal of Systematic Palaeontology* **16**, 263–277. (doi:10.1080/14772019.2017.1291116)
35. Andrews CW. 1915 I.—Note on a Mounted Skeleton of *Ophthalmosaurus icenicus*, Seeley. *Geological Magazine* **2**, 145–146.
36. Arkhangelsky MS, Zverkov NG. 2014 On a new ichthyosaur of the genus *Undorosaurus*. *Proceedings of the Zoological Institute RAS* **318**, 10.
37. Druckenmiller PS, Hurum JH, Knutsen EM, Nakrem HA. 2012 Two new ophthalmosaurids (Reptilia: Ichthyosauria)- from the Agardhfjellet Formation (Upper Jurassic: Volgian/Tithonian),- Svalbard, Norway. *Norwegian Journal of Geology* **92**, 311–329.
38. Tyborowski D. 2016 A new ophthalmosaurid ichthyosaur species from the Late Jurassic of Owadów-Brzezinki Quarry, Poland. *Acta Palaeontologica Polonica* **61**. (doi:10.4202/app.00252.2016)

39. Wade M. 1984 *Platypterygius australis*, an Australian Cretaceous ichthyosaur. *Lethaia* **17**, 99–113. (doi:10.1111/j.1502-3931.1984.tb01713.x)
40. Kolb C, Sander PM. 2009 Redescription of the ichthyosaur *Platypterygius hercynicus* (Kuhn 1946) from the Lower Cretaceous of Salzgitter (Lower Saxony, Germany). *Palaeontographica Abteilung A: Palaeozoologie–Stratigraphie* **288**, 151–192.
41. Druckenmiller PS, Maxwell EE. 2010 A new Lower Cretaceous (lower Albian) ichthyosaur genus from the Clearwater Formation, Alberta, Canada. *Canadian Journal of Earth Sciences* **47**, 1037–1053. (doi:10.1139/E10-028)
